# Supplementary material for: Intravaginal Administration of Interleukin 12 during Genital Gonococcal Infection in Mice Induces Immunity to Heterologous Strains of Neisseria gonorrhoeae
Source: PubMed Central journal article supplement (PMC5793040; doi:10.1128/msphere.00421-17), 2018-01-31

### Reinfection with GC68

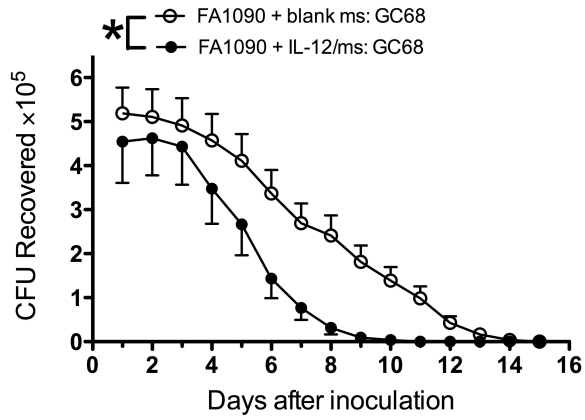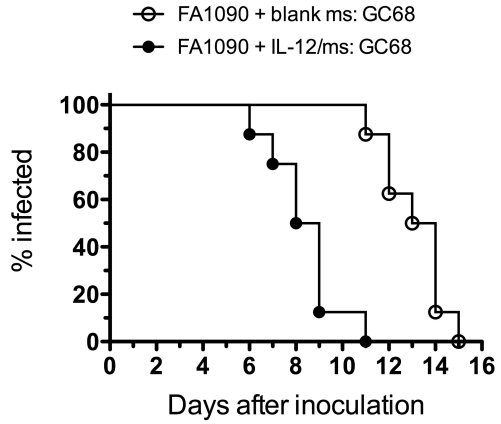

### Reinfection with GC69

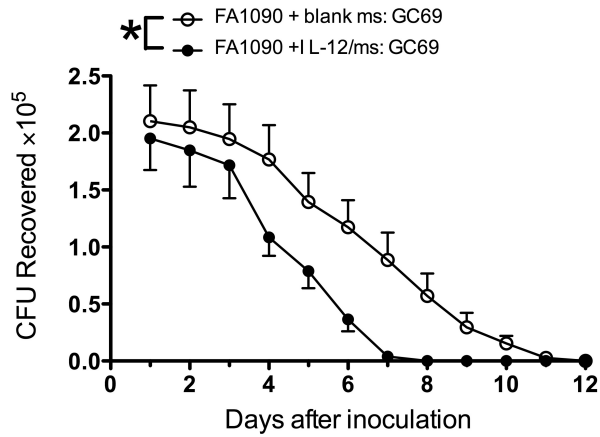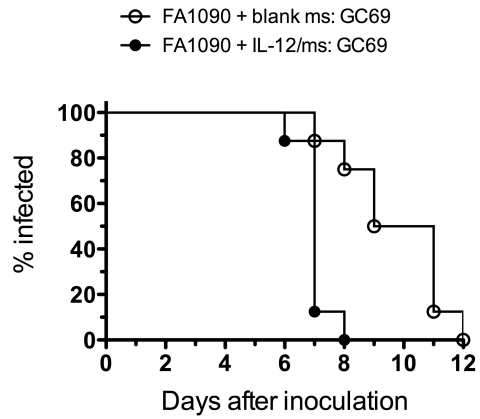

Supplement: sph001182467sf3.pdf [file sph001182467sf3.pdf]
